# Supplementary material for: Decision-Making Framework for GI Layout Considering Site Suitability and Weighted Multi-Function Effectiveness: A Case Study in Beijing Sub-Center
Source: MDPI journal article supplement (doi:10.3390/w14111765), 2022-05-30
Supplement: s1 [file s1]

Archive with 1 entries (1 files):
- water-1737548-supplementary.pdf
