# Supplementary material for: Decision-Making Framework for GI Layout Considering Site Suitability and Weighted Multi-Function Effectiveness: A Case Study in Beijing Sub-Center
Source: MDPI journal article supplement (doi:10.3390/w14111765), 2022-05-30
Supplement: s1 [file s1 › water-1737548-supplementary.pdf]

## Supplementary Materials

**Table S1.** Control effectiveness of GI

|                                    | Detention<br>storage | Sedimentation | Adsorption  | Infiltration | Microbial<br>degradation | Filtration  | Plant<br>uptake | Evapotranspiration<br>volatilization |
|------------------------------------|----------------------|---------------|-------------|--------------|--------------------------|-------------|-----------------|--------------------------------------|
| Runoff volume control              | High                 | None          | Low         | Medium/high  | None                     | None        | Low             | Low                                  |
| Runoff peak time delay             | Medium/high          | None          | Low         | Low          | None                     | Low         | Low             | Low                                  |
| Runoff peak volume reduction       | High                 | None          | Low         | Medium/high  | None                     | Low         | Low             | Low                                  |
| Suspended pollutant removal        | Low/medium           | High          | Medium      | Medium/high  | Low                      | High        | None            | None                                 |
| Oxygen-consuming pollutant removal | Low                  | Medium        | Medium      | Medium       | Medium                   | Medium      | Medium          | Low                                  |
| Nutrient pollutant removal         | Low/medium           | High          | High        | High         | Low                      | High        | High            | None                                 |
| Toxic pollutant removal            | Medium               | Medium/high   | Medium/high | Medium/high  | Low                      | Medium/high | Medium/high     | Medium                               |
| Runoff utilization capacity        | High                 | None          | Low         | Medium/high  | None                     | None        | Low             | Low                                  |

**Table S2.** Runoff control mechanisms and effectiveness for common structural GIs

|                           | Detention<br>storage | Sedimentation | Adsorption  | Infiltration | Microbial<br>degradation | Filtration  | Plant<br>uptake | Evapotranspiration<br>volatilization |
|---------------------------|----------------------|---------------|-------------|--------------|--------------------------|-------------|-----------------|--------------------------------------|
| Infiltration trench (IT)  | Low/medium           | Low/medium    | Medium/high | High         | Medium                   | Medium/high | Low             | Low                                  |
| Dry Pond (DP)             | High                 | Medium/high   | Medium      | Low          | Low/medium               | Low         | Low             | Medium                               |
| Wet Pond (WP)             | High                 | High          | Medium      | Low/medium   | Medium                   | Low         | Medium          | Medium                               |
| Sunken green spaces (SGS) | Low/medium           | Low           | Medium      | Medium       | Low/medium               | Medium      | Medium          | Low/medium                           |
| Vegetation swales (VS)    | Medium               | Low/medium    | Medium      | Medium       | Low/medium               | Medium      | Medium          | Low/medium                           |
| Green Roof (GR)           | Medium/high          | Low/medium    | Medium      | Low          | Medium                   | Medium      | Medium          | Low/medium                           |
| Permeable pavement (PP)   | Low/medium           | Low/medium    | Medium/high | High         | Low/medium               | Medium/high | Low             | Low                                  |

|                              |        |        |        |        |             |        |             |            |
|------------------------------|--------|--------|--------|--------|-------------|--------|-------------|------------|
| Bioretention facilities (BF) | Medium | Medium | Medium | Medium | Medium/high | Medium | Medium/high | Low/medium |
|------------------------------|--------|--------|--------|--------|-------------|--------|-------------|------------|

The system assigns numbers from 0 to 5 to represent effectiveness of unsuitable, low, low/medium, medium, medium/high, high.

$$X_{ij} = \sum_{i=1}^m \sum_{j=1}^n e_{ik} \times f_{ik}, \quad k = 1, 2, \dots, 8$$

where  $X_{ij}$  denotes the effectiveness of the  $i$ th GI in controlling the  $j$ th target pollutant.  $e_{ik}$  denotes the function of the  $k$ th process or mechanism associated with the  $i$ th GI. These processes are presented in S.I. Table 1. A total of eight GI processes were considered.  $f_{ik}$  denotes the effectiveness of the  $k$ th process or mechanism in controlling the  $j$ th target pollutant as shown in S.I. Table 2.

**Table S3.** Capital, operational, and maintenance cost of structural GIs

|                              | Construction costs | Management strategies                                                                                                                       | Maintenance costs |
|------------------------------|--------------------|---------------------------------------------------------------------------------------------------------------------------------------------|-------------------|
| Infiltration trench (IT)     | 230~550            | Regular inspection, dredging<br>Requires infill replacement every 5–10 years                                                                | 10~40             |
| Dry Pond (DP)                | 70~710             | Requires dredging every 5–10 years                                                                                                          | 2~15              |
| Wet Pond (WP)                | 70~1150            | Requires grass cuttings twice every year; Requires equipment checked every year<br>Requires dredging and sediment cleaning every 5–10 years | 6.5~12.5          |
| Sunken green spaces (SGS)    | 230~300            | Regular inspection; sediment cleaning; Requires replacement after 10–12 years                                                               | 2~3.5             |
| Vegetation swales (VS)       | 60~470             | Regular cuttings; dredging<br>Requires dredging every 10 years                                                                              | 4~8.2             |
| Green Roof (GR)              | 1000~1300          | Regular inspection and maintenance: the same as common roof                                                                                 | 7~10              |
| Permeable pavement (PP)      | 260~1800           | Regular cleaning road blockages and sludge of gaps;<br>Depreciation life of permeable asphalt is 10–15 years                                | 2~12              |
| Bioretention facilities (BF) | 540~1200           | Regular pruning, weeding, adding plants, soil; Irrigation when rainless                                                                     | 30~76             |
